# Supplementary material for: TP53 Abnormalities Are Underlying the Poor Outcome Associated with Chromothripsis in Chronic Lymphocytic Leukemia Patients with Complex Karyotype
Source: MDPI journal article supplement (doi:10.3390/cancers14153715), 2022-07-29
Supplement: s1 [file s1]

***TP53* abnormalities are underlying the poor outcome associated with chromothripsis in chronic lymphocytic leukemia patients with complex karyotype**

**Ramos-Campoy, et al**

**SUPPLEMENTARY MATERIAL**

Supplementary Figures

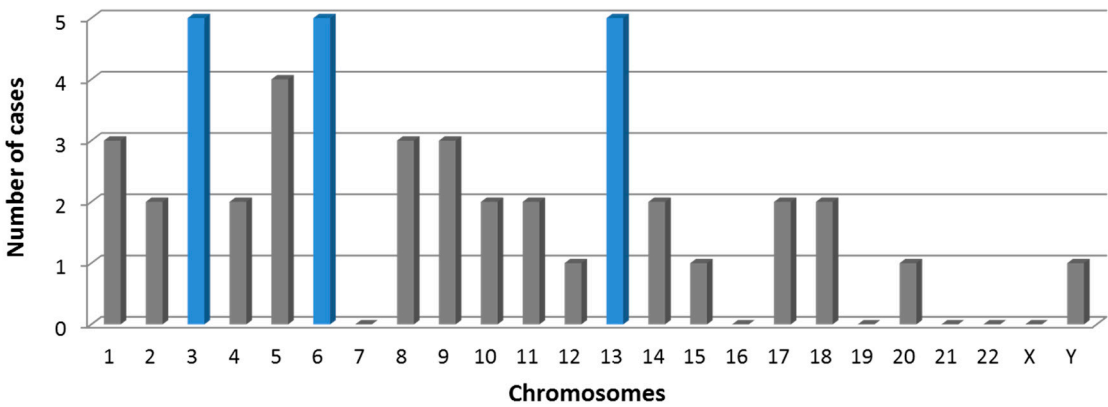

**Figure S1. Number of cases showing chromothripsis for each chromosome.** Chromosomes are represented on the X-axis and the total number of cases showing chromothripsis for each chromosome is represented on the Y-axis. The chromosomes involved most in the cohort (3, 6 and 13) are highlighted in blue.

### Case #1: Chromosome 1

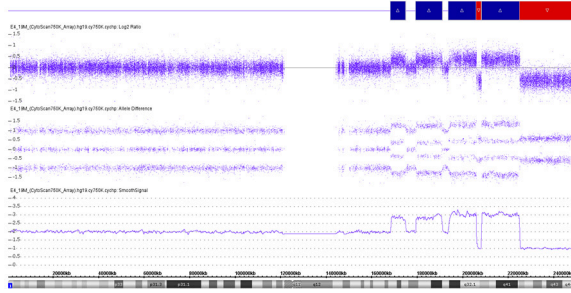

### Case #2: Chromosome 1

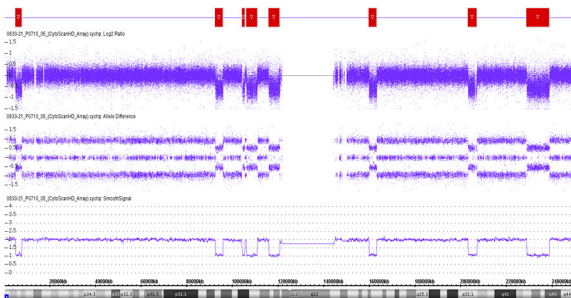

### Case #3: Chromosome 15

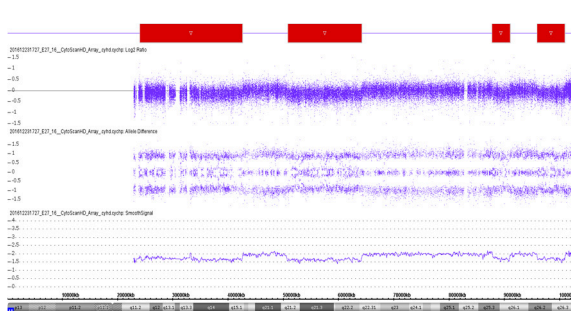

### Case #3: Chromosome 17

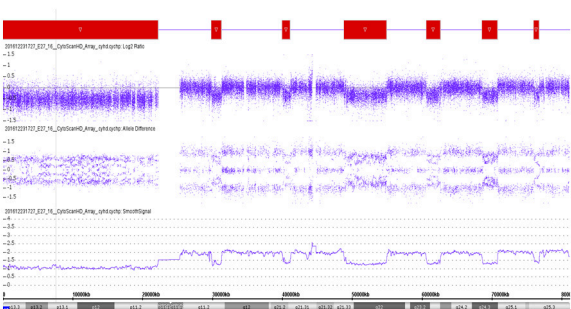

### Case #4: Chromosome 3

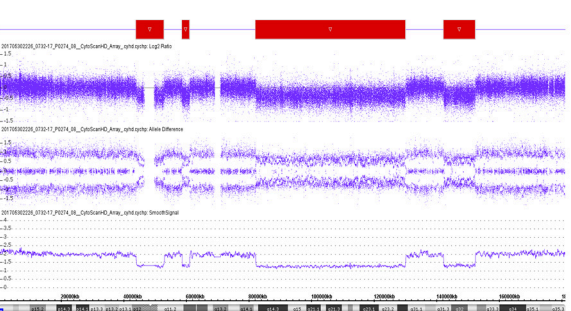

### Case #5: Chromosome 18

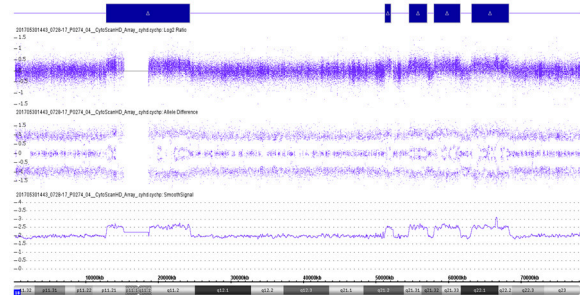

### Case #6: Chromosome 5

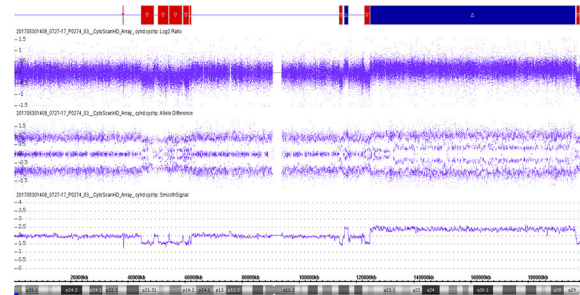

### Case #7: Chromosome 4

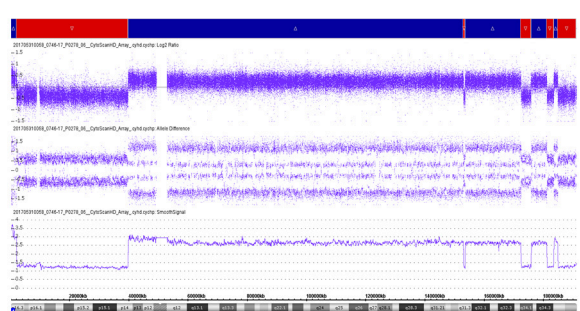

### Case #8: Chromosome 6

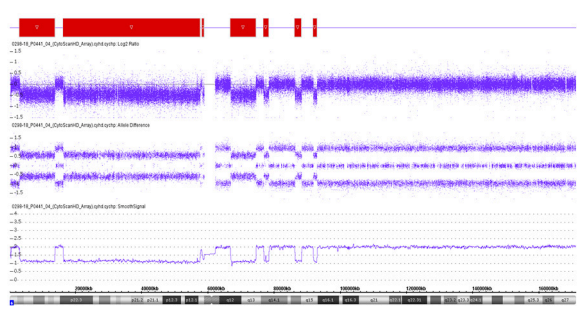

### Case #9: Chromosome 6

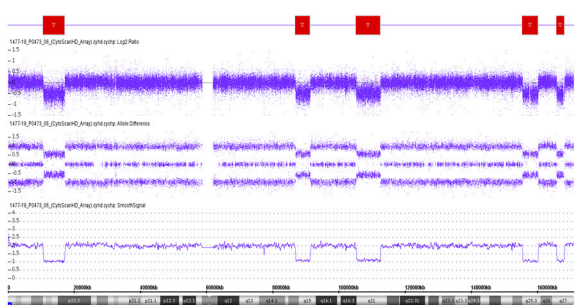

**Figure S2. Copy number profiles of some of the chromothriptic chromosomes.** Copy number profiles derived from genomic microarray analyses were available for 18 cases.

### Case #16: Chromosome 12

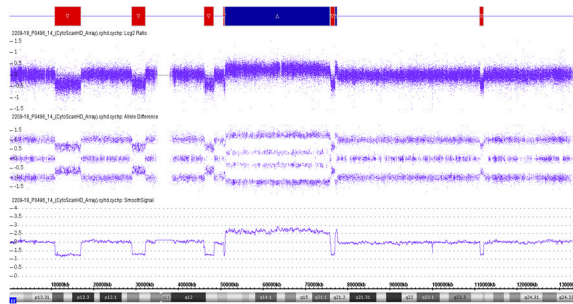

### Case #17: Chromosome 11

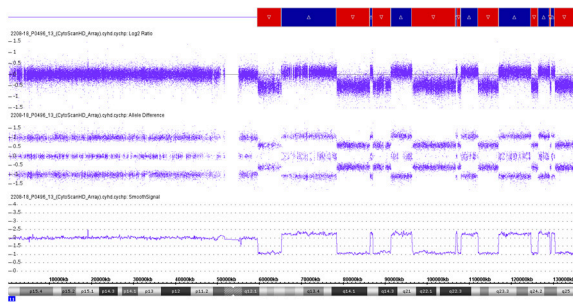

### Case #18: Chromosome 8

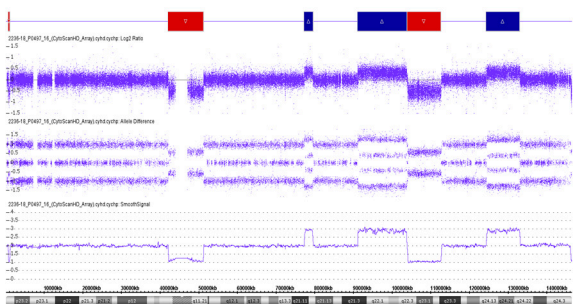

### Case #19: Chromosome 2

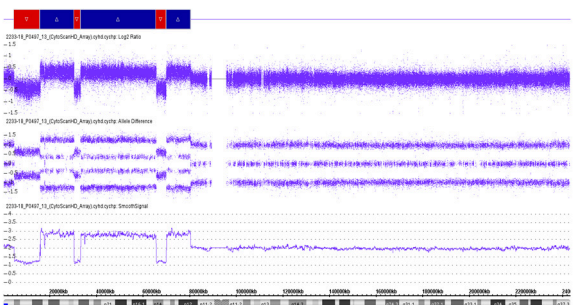

### Case #19: Chromosome 6

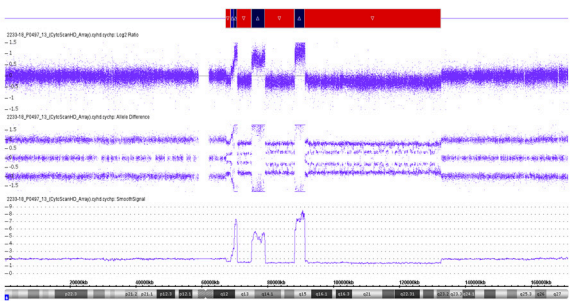

### Case #19: Chromosome 11

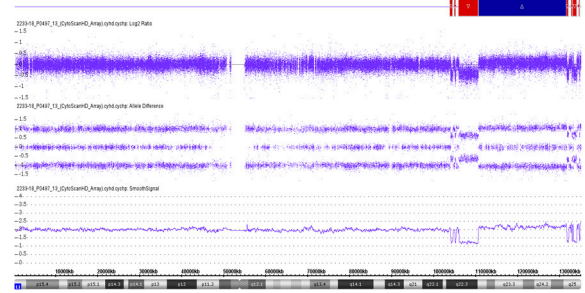

### Case #19: Chromosome Y

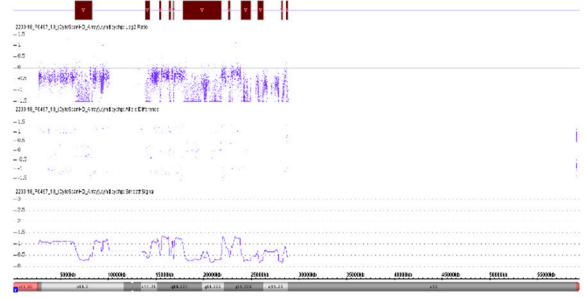

### Case #20: Chromosome 3

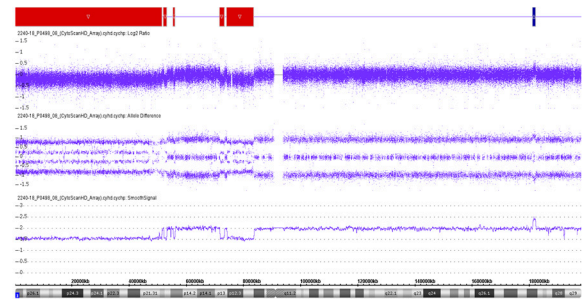

### Case #26: Chromosome 10

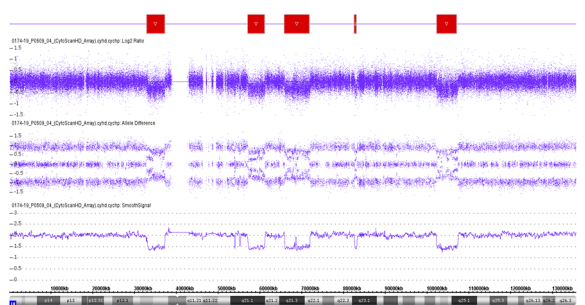

### Case #26: Chromosome 13

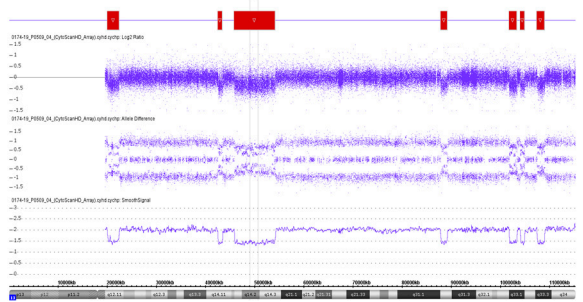

**Figure S2 (cont.). Copy number profiles of some of the chromothrptic chromosomes.** Copy number profiles derived from genomic microarray analyses were available for 18 cases.



Case #27: Chromosome 6

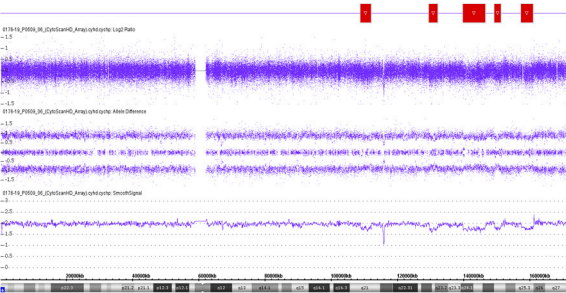

Case #27: Chromosome 14

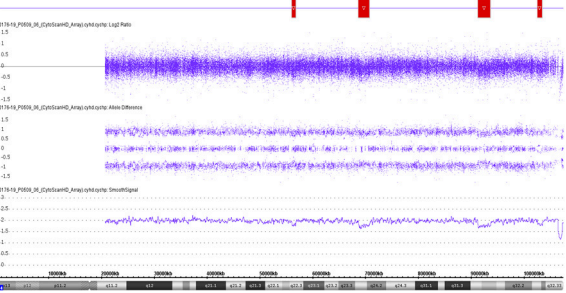

Case #31: Chromosome 3

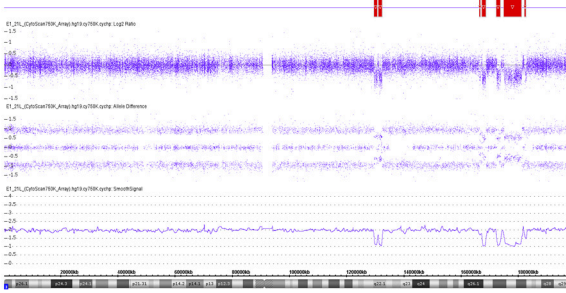

Case #31: Chromosome 13

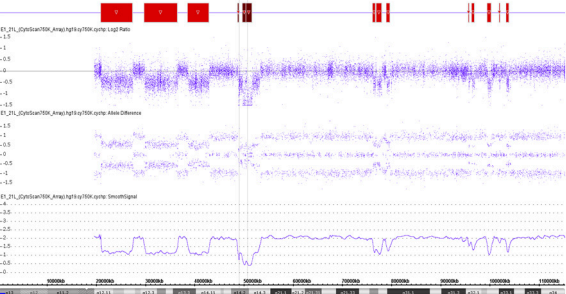

Case #32: Chromosome 6

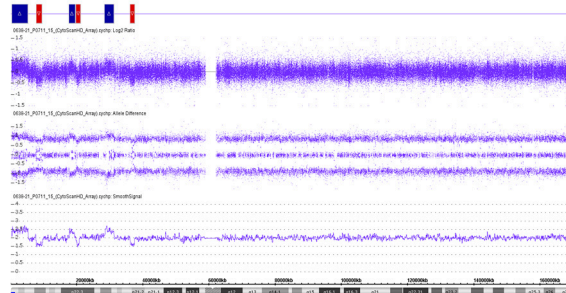

**Figure S2 (cont.). Copy number profiles of some of the chromothriptic chromosomes.** Copy number profiles derived from genomic microarray analyses were available for 18 cases.

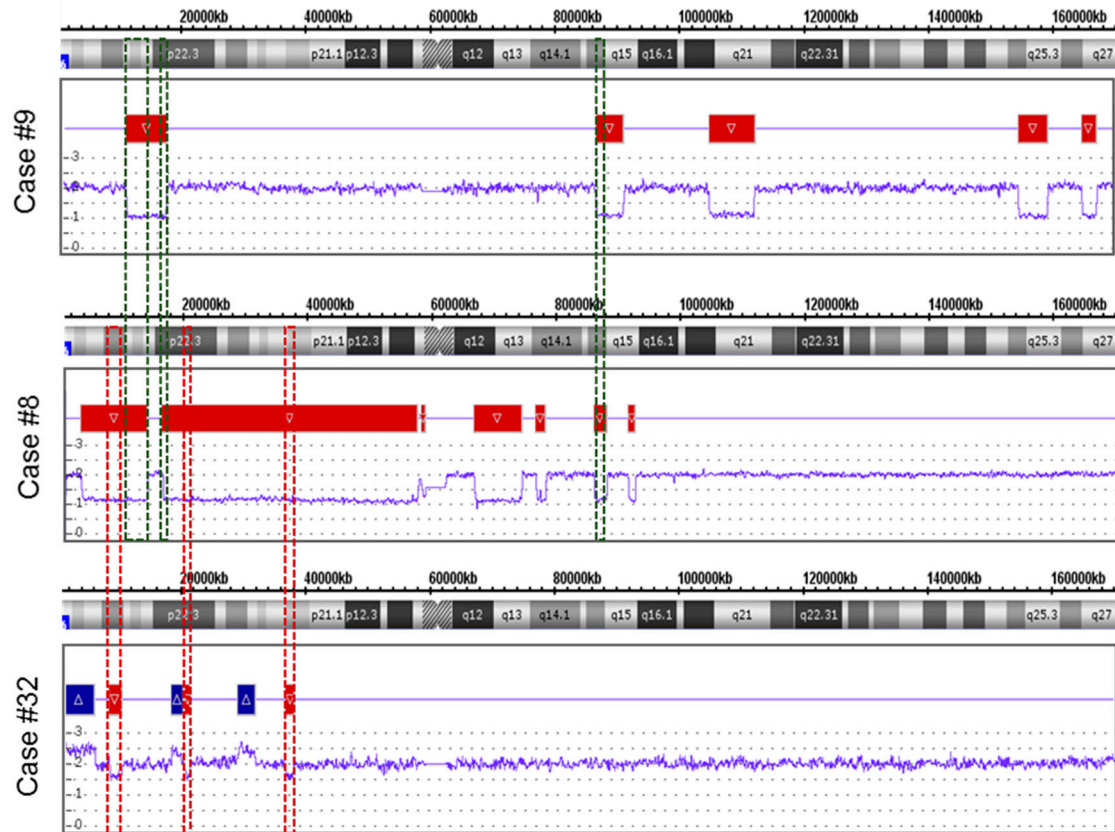

**Figure S3. Chromothripsis detected in chromosome 6 in those cases in which optical genome mapping only revealed intra-chromosomal chromothripsis-related rearrangements.** Whole chromosome 6 view of genomic microarray results from cases #8, #9 and #32, which carried intra-chromosomal rearrangements when analysed by OGM, are represented. Only small deleted fragments were common between case #8 and the other two remaining cases. Specifically, three fragments of 2.83 Mb (10,743,398-13,571,692), 1.20 Mb (16,137,146-17,257,084) and 1.17 Mb (86,948,132-88,115,441) were shared between cases #8 and #9 (highlighted in green) and three fragments of 1.79 Mb (7,651,724-9,438,895), 0.64 Mb (19,953,714-20,591,009) and 1.28 Mb (36,084,473-37,366,801) were common between cases #8 and #32 (highlighted in red).
