# Supplementary material for: TP53 Abnormalities Are Underlying the Poor Outcome Associated with Chromothripsis in Chronic Lymphocytic Leukemia Patients with Complex Karyotype
Source: MDPI journal article supplement (doi:10.3390/cancers14153715), 2022-07-29
Supplement: s1 [file s1]

**TP53 abnormalities are underlying the poor outcome associated with chromothripsis in chronic lymphocytic leukemia patients with complex karyotype**

**Ramos-Campoy, et al**

## **SUPPLEMENTARY MATERIAL**

### **Supplementary Tables**

**Table S1.** Genomic microarray platforms used in this study.

| <b>Genomic microarray platform</b>                        | <b>n (%)</b> |
|-----------------------------------------------------------|--------------|
| <b>CytoScan 750K array (ThermoFisher)</b>                 | 2 (6.1%)     |
| <b>CytoScan HD array (ThermoFisher)</b>                   | 16 (48.5%)   |
| <b>Affymetrix SNP6.0 (ThermoFisher)</b>                   | 7 (21.2%)    |
| <b>SurePrint G3 Human CGH 8x60K (Agilent)*</b>            | 1 (3.0%)     |
| <b>SurePrint G3 ISCA CGH+SNP Bundle, 4x180K (Agilent)</b> | 4 (12.1%)    |
| <b>Illumina Human Omni1-Quad array (Illumina)</b>         | 3 (9.1%)     |

\*Custom design described in Salaverria I, Martín-García D, López C, et al. Detection of chromothripsis-like patterns with a custom array platform for chronic lymphocytic leukemia. *Genes Chromosomes Cancer*. 2015;54(11):668-80.

**Table S2.** Patterns of chromothripsis found in cases with 7-9 switches and those with  $\geq 10$  switches between 2-3 copy number states.

|                              | Events with 7-9 switches<br>n = 16 | Events with $\geq 10$ switches<br>n = 30 | <i>P-value</i> |
|------------------------------|------------------------------------|------------------------------------------|----------------|
| <b>Type of CNVs</b>          |                                    |                                          |                |
| Only losses of material      | 8 (50.0%)                          | 17 (56.7%)                               | 0.850          |
| Only gains of material       | 1 (6.2%)                           | 1 (3.3%)                                 |                |
| Alternating gains and losses | 7 (43.8%)                          | 12 (40.0%)                               |                |
| <b>Location of the CNVs</b>  |                                    |                                          |                |
| Chromosome arm               | 8 (50.0%)                          | 9 (30.0%)                                | 0.181          |
| Whole chromosome             | 8 (50.0%)                          | 21 (70.0%)                               |                |

**Table S3.** Detailed information of the chromothriptic events detected by GM including the genes involved in the rearrangements (*shown in the excel file attached*).

**Table S4.** Detailed information of the chromothriptic events detected by GM and karyotypes obtained by CBA (*shown in the excel file attached*).

**Table S5.** Results obtained by optical genome mapping in those chromosomes with chromothripsis (*shown in the excel file attached*).

**Table S6.** Review of the literature published about chromothripsis in CLL (*shown in the excel file attached*).

Supplementary Figures

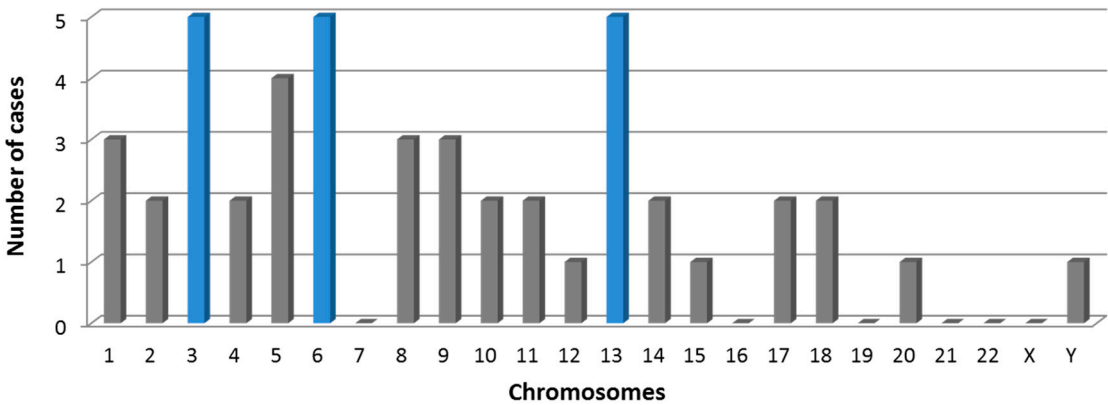

**Figure S1. Number of cases showing chromothripsis for each chromosome.** Chromosomes are represented on the X-axis and the total number of cases showing chromothripsis for each chromosome is represented on the Y-axis. The chromosomes involved most in the cohort (3, 6 and 13) are highlighted in blue.

### Case #1: Chromosome 1

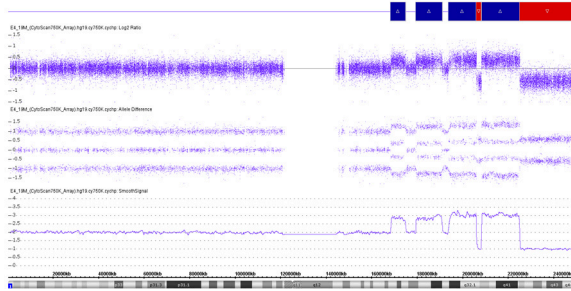

### Case #2: Chromosome 1

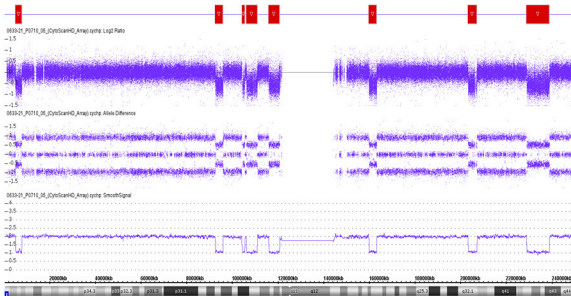

### Case #3: Chromosome 15

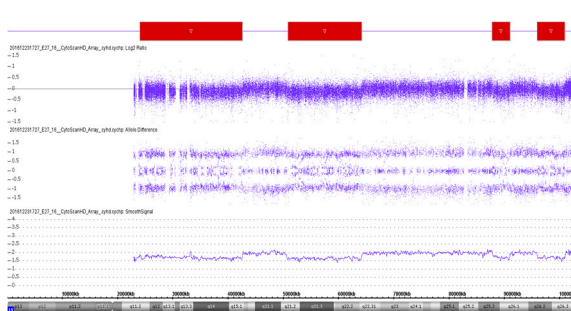

### Case #3: Chromosome 17

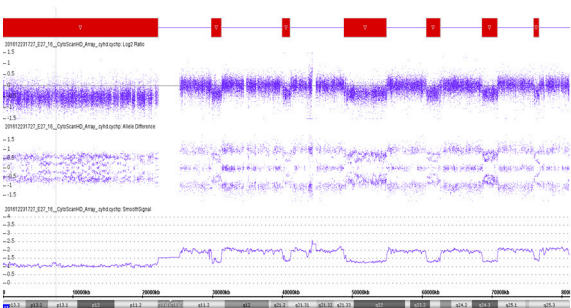

### Case #4: Chromosome 3

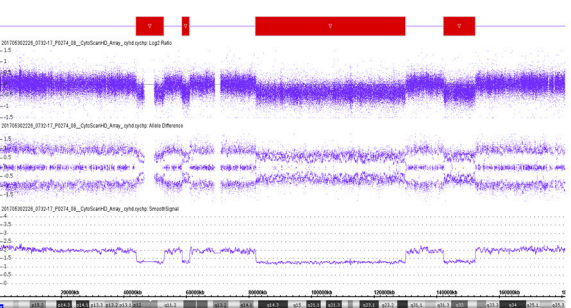

### Case #5: Chromosome 18

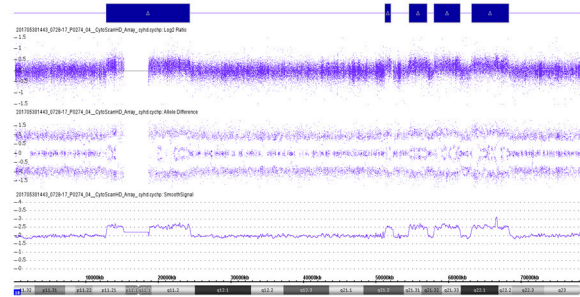

### Case #6: Chromosome 5

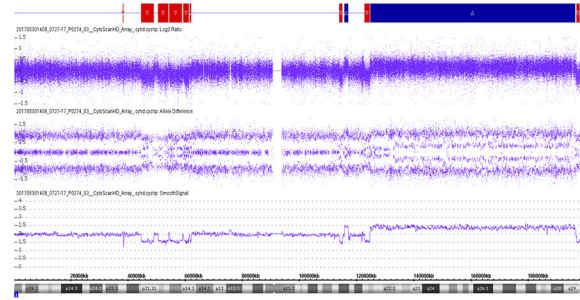

### Case #7: Chromosome 4

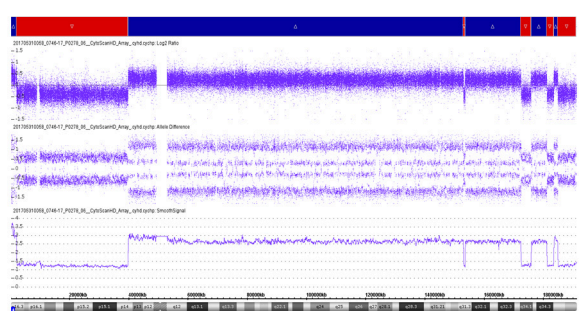

### Case #8: Chromosome 6

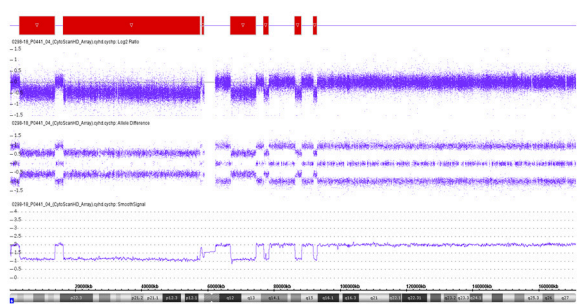

### Case #9: Chromosome 6

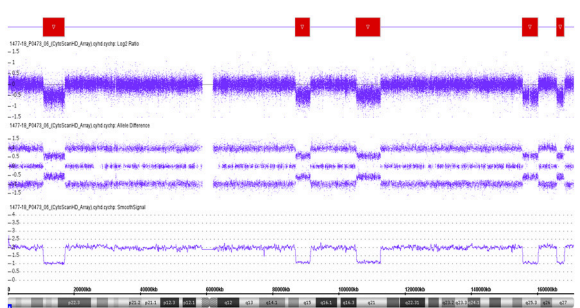

**Figure S2. Copy number profiles of some of the chromothriptic chromosomes.** Copy number profiles derived from genomic microarray analyses were available for 18 cases.



### Case #16: Chromosome 12

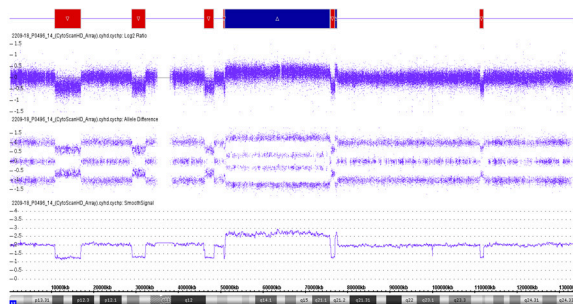

### Case #17: Chromosome 11

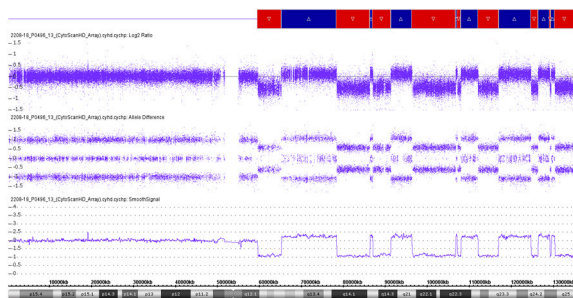

### Case #18: Chromosome 8

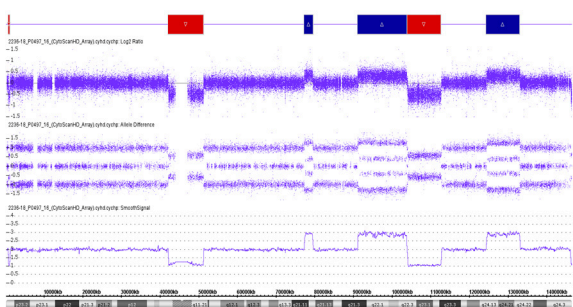

### Case #19: Chromosome 2

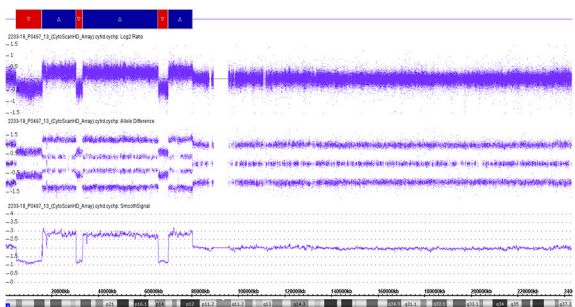

### Case #19: Chromosome 6

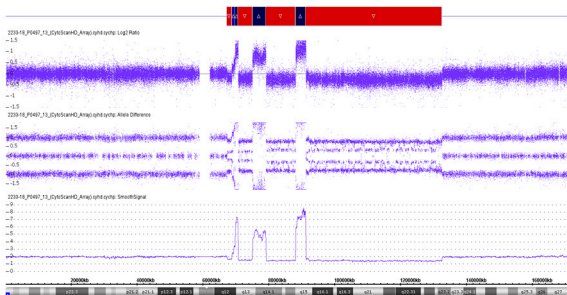

### Case #19: Chromosome 11

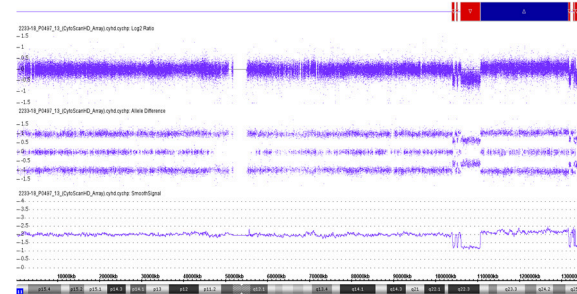

### Case #19: Chromosome Y

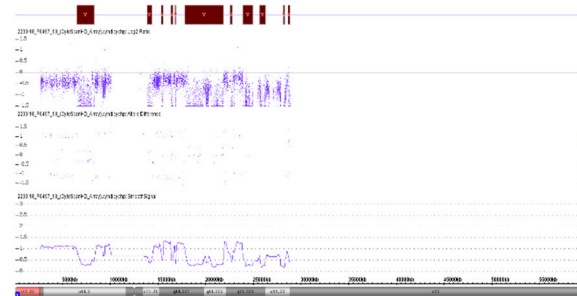

### Case #20: Chromosome 3

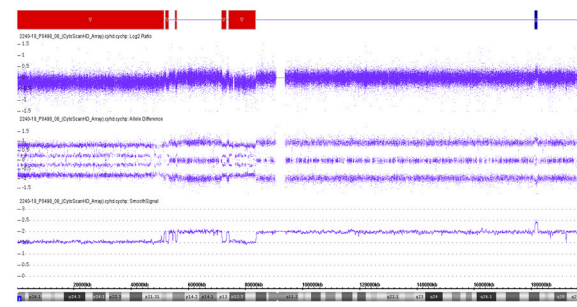

### Case #26: Chromosome 10

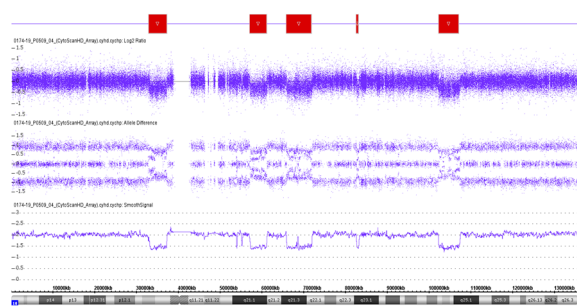

### Case #26: Chromosome 13

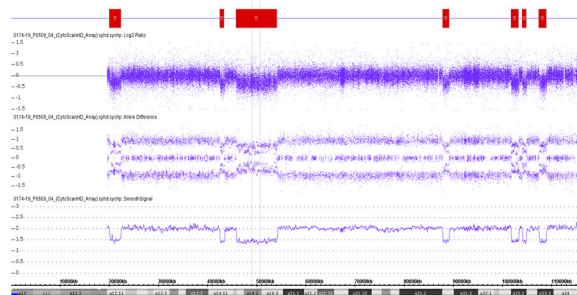

**Figure S2 (cont.). Copy number profiles of some of the chromothriptic chromosomes.** Copy number profiles derived from genomic microarray analyses were available for 18 cases.

### Case #27: Chromosome 6

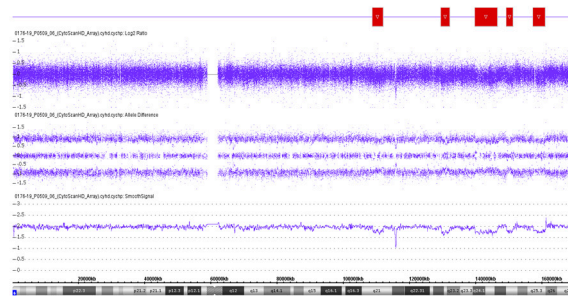

### Case #27: Chromosome 14

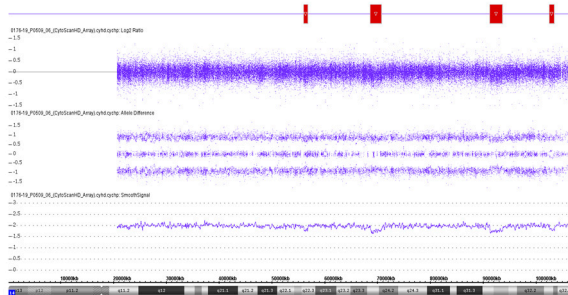

### Case #31: Chromosome 3

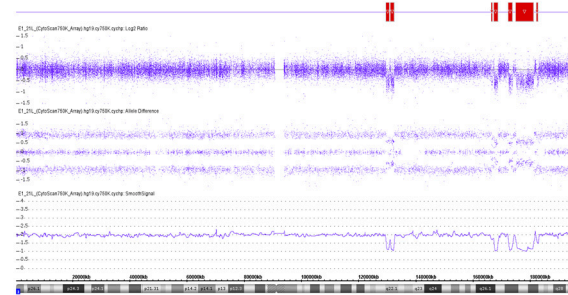

### Case #31: Chromosome 13

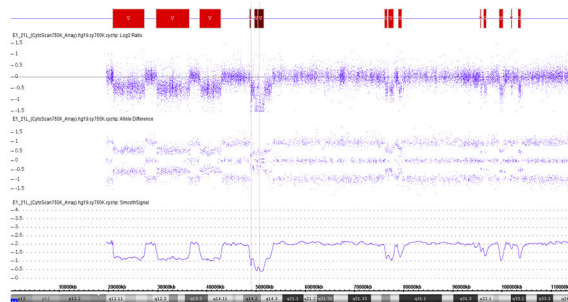

### Case #32: Chromosome 6

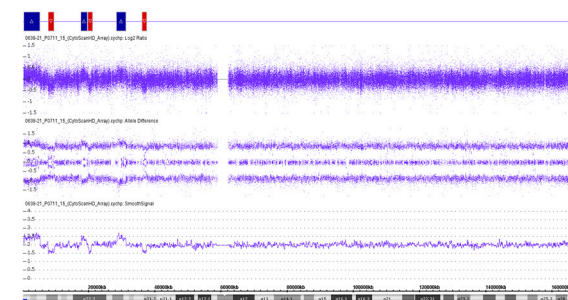

**Figure S2 (cont.). Copy number profiles of some of the chromothriptic chromosomes.** Copy number profiles derived from genomic microarray analyses were available for 18 cases.

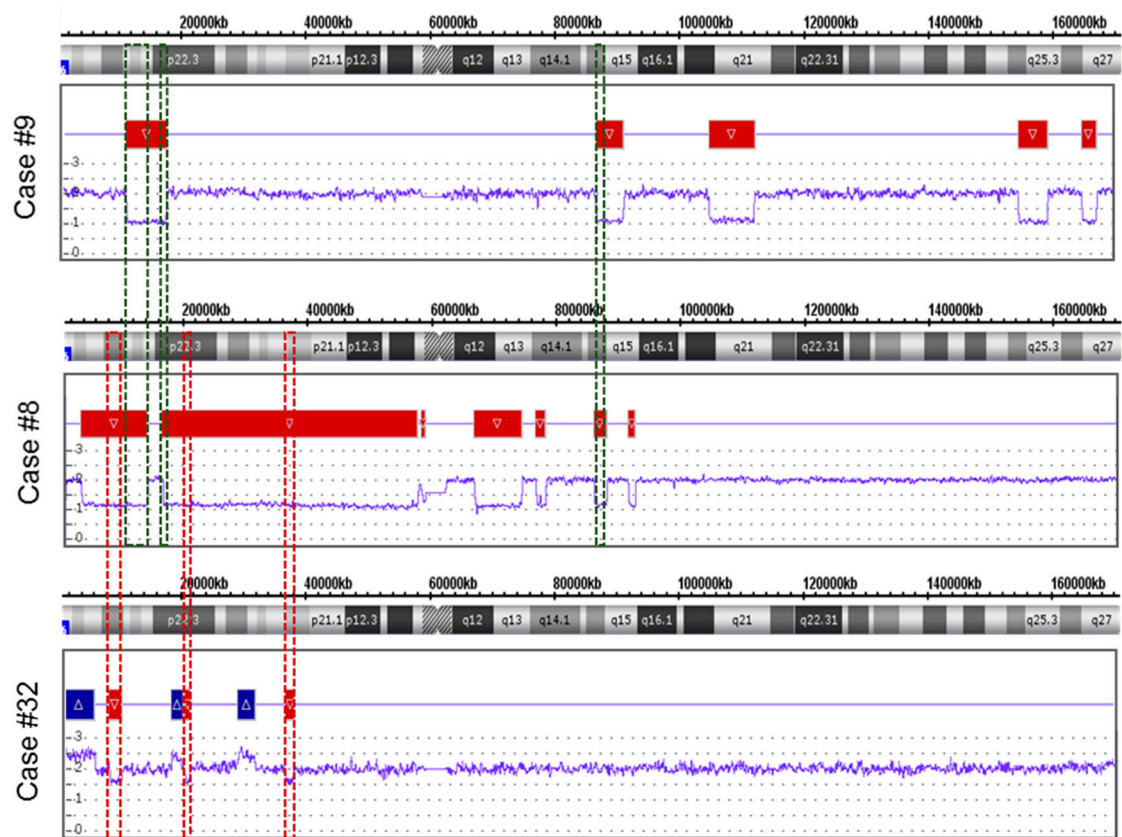

**Figure S3. Chromothripsis detected in chromosome 6 in those cases in which optical genome mapping only revealed intra-chromosomal chromothripsis-related rearrangements.** Whole chromosome 6 view of genomic microarray results from cases #8, #9 and #32, which carried intra-chromosomal rearrangements when analysed by OGM, are represented. Only small deleted fragments were common between case #8 and the other two remaining cases. Specifically, three fragments of 2.83 Mb (10,743,398-13,571,692), 1.20 Mb (16,137,146-17,257,084) and 1.17 Mb (86,948,132-88,115,441) were shared between cases #8 and #9 (highlighted in green) and three fragments of 1.79 Mb (7,651,724-9,438,895), 0.64 Mb (19,953,714-20,591,009) and 1.28 Mb (36,084,473-37,366,801) were common between cases #8 and #32 (highlighted in red).
